# Supplementary material
Source: publisher figshare collection journal article supplement (https://frontiersin.figshare.com/ndownloader/files/26063213)

## Appendix File S5. Sensitivity analyses on all-MI.

**Figure A.** Summary forest plot for sensitivity analysis on all-MI by year (excluding trials published before 2000)

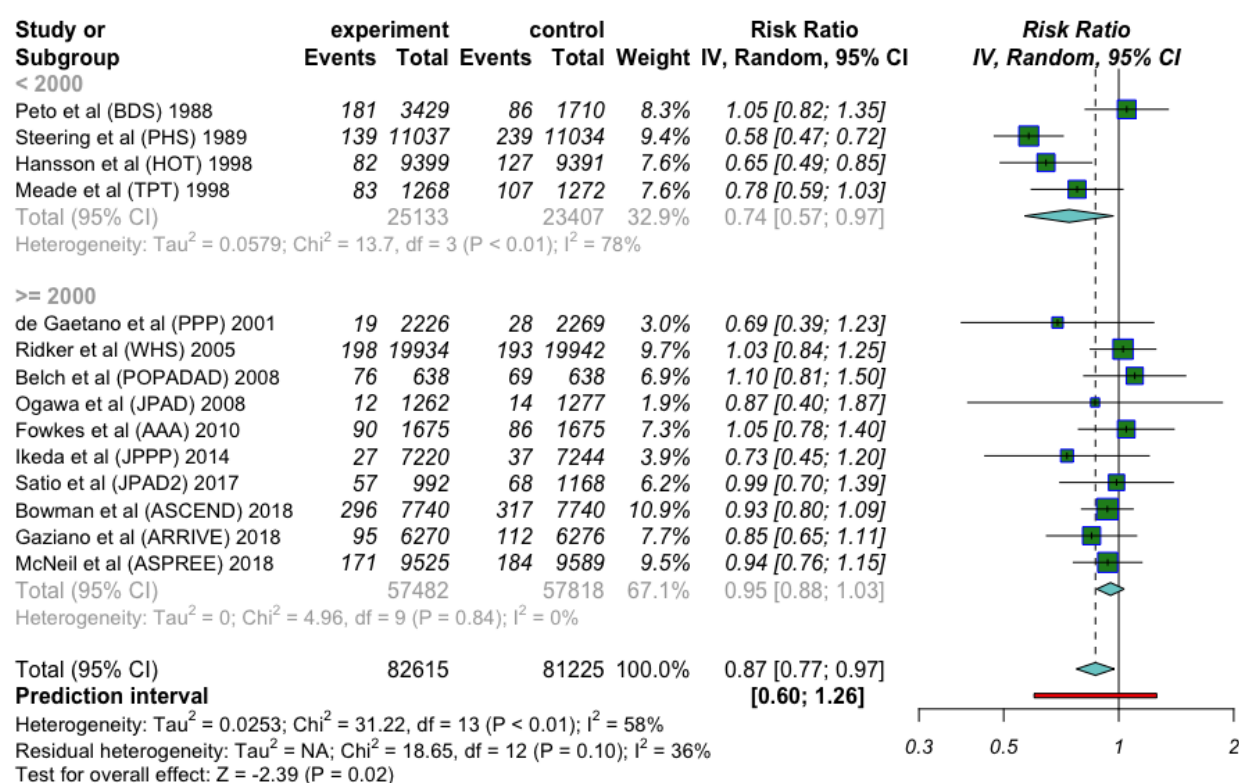

RR

**Figure B.** Summary forest plot for sensitivity analysis on all-MI by blinding (excluding open-label trials)

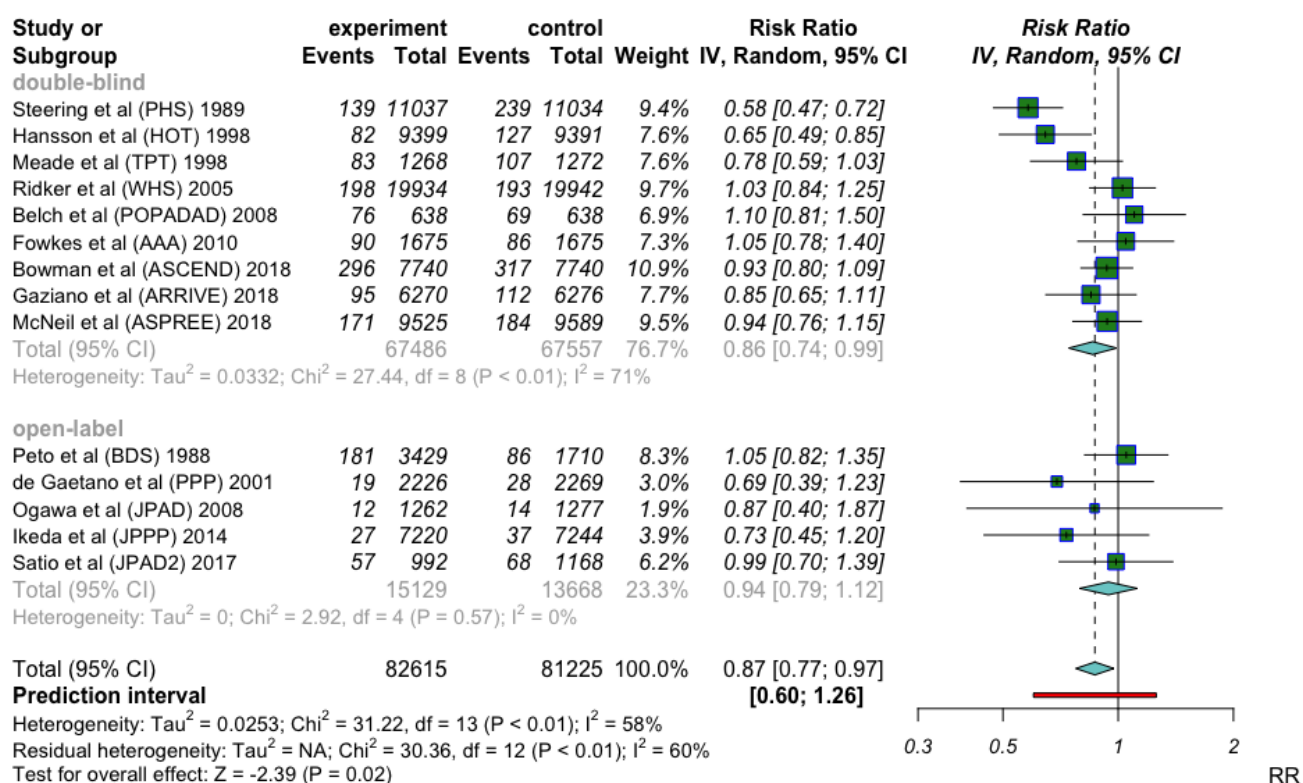

**Figure C.** Summary forest plot for sensitivity analysis on all-MI by study quality (excluding high risk trials)

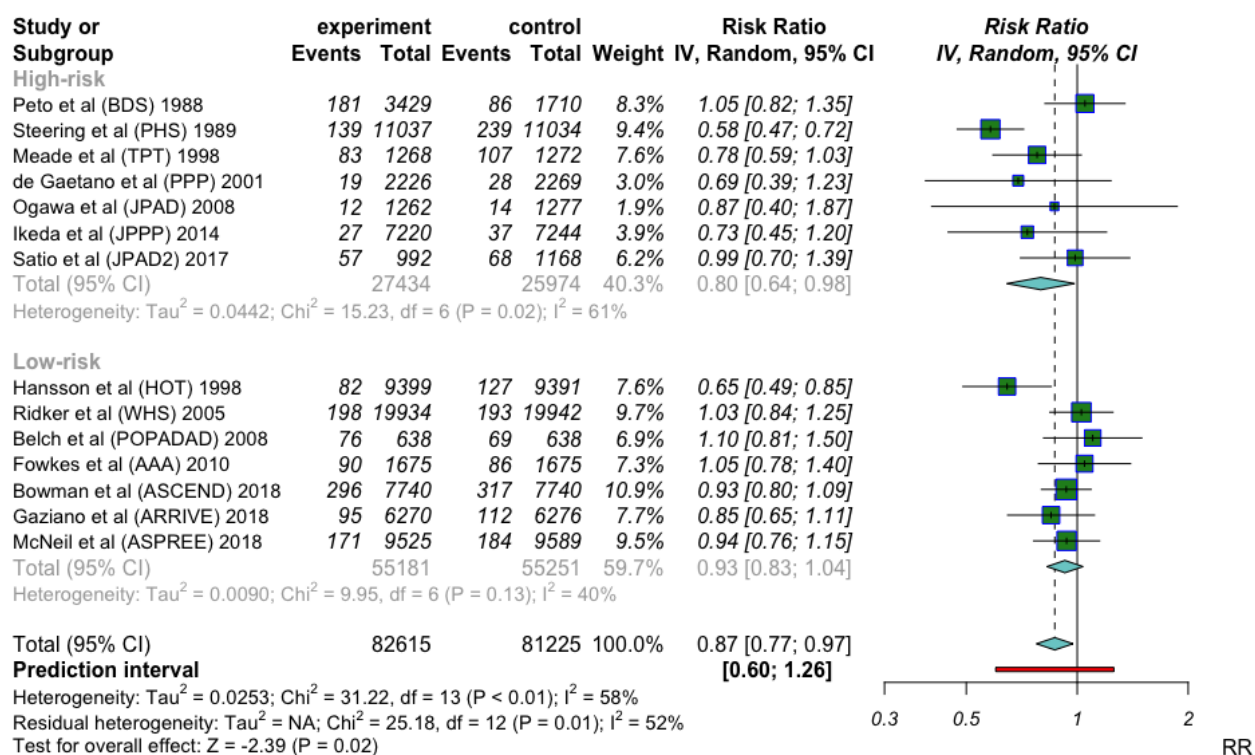

**Figure D.** Summary forest plot for sensitivity analysis on all-MI by asymptomatic PAD (excluding asymptomatic PAD trials)

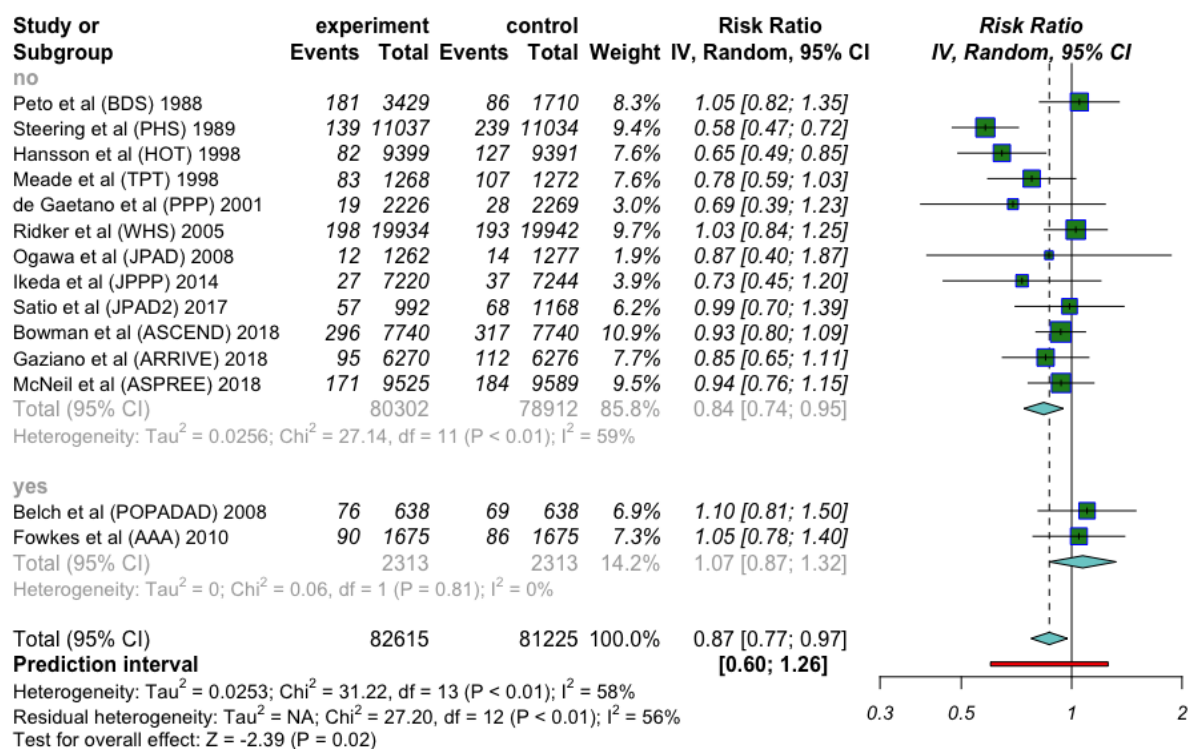

**Figure E.** Summary forest plot for sensitivity analysis on all-MI by male populations (excluding 100% male individual trials)

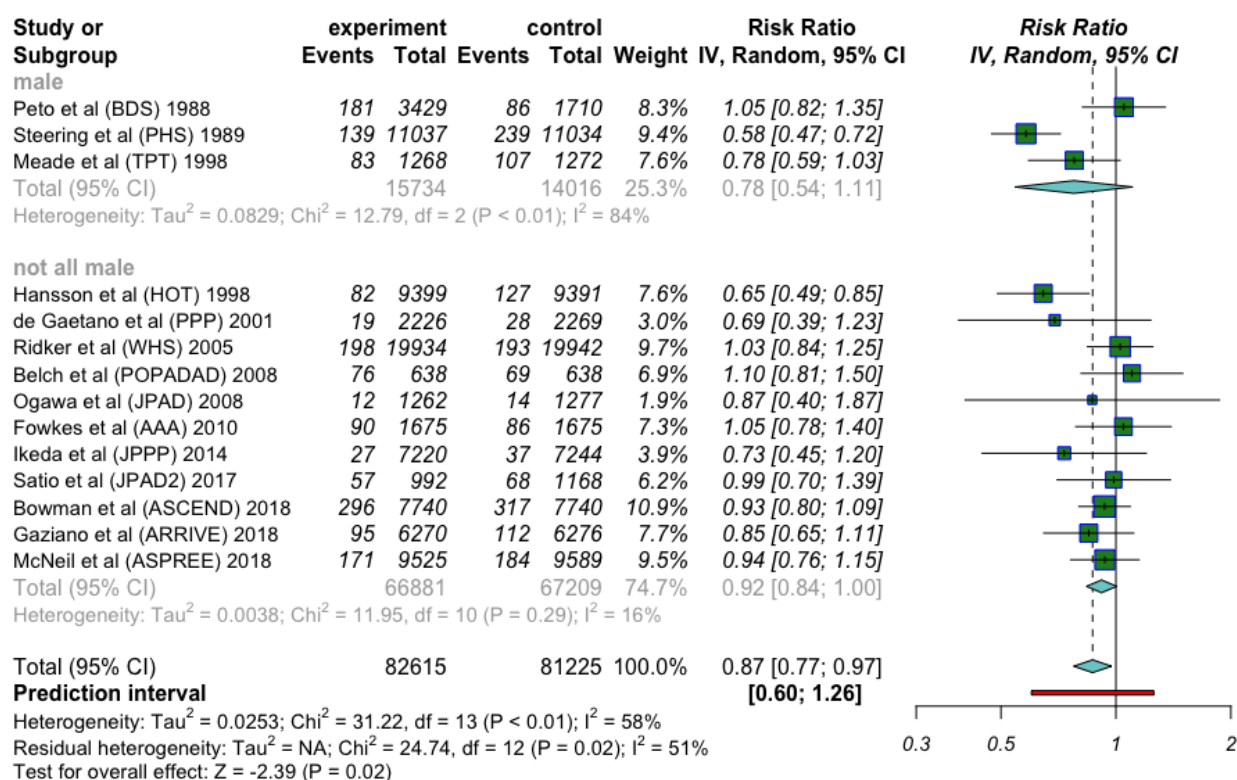

RR

**Figure F.** Summary forest plot for sensitivity analysis on all-MI by diabetes status (excluding 100% diabetic individual trials and restricted on 100% diabetic individual trials)

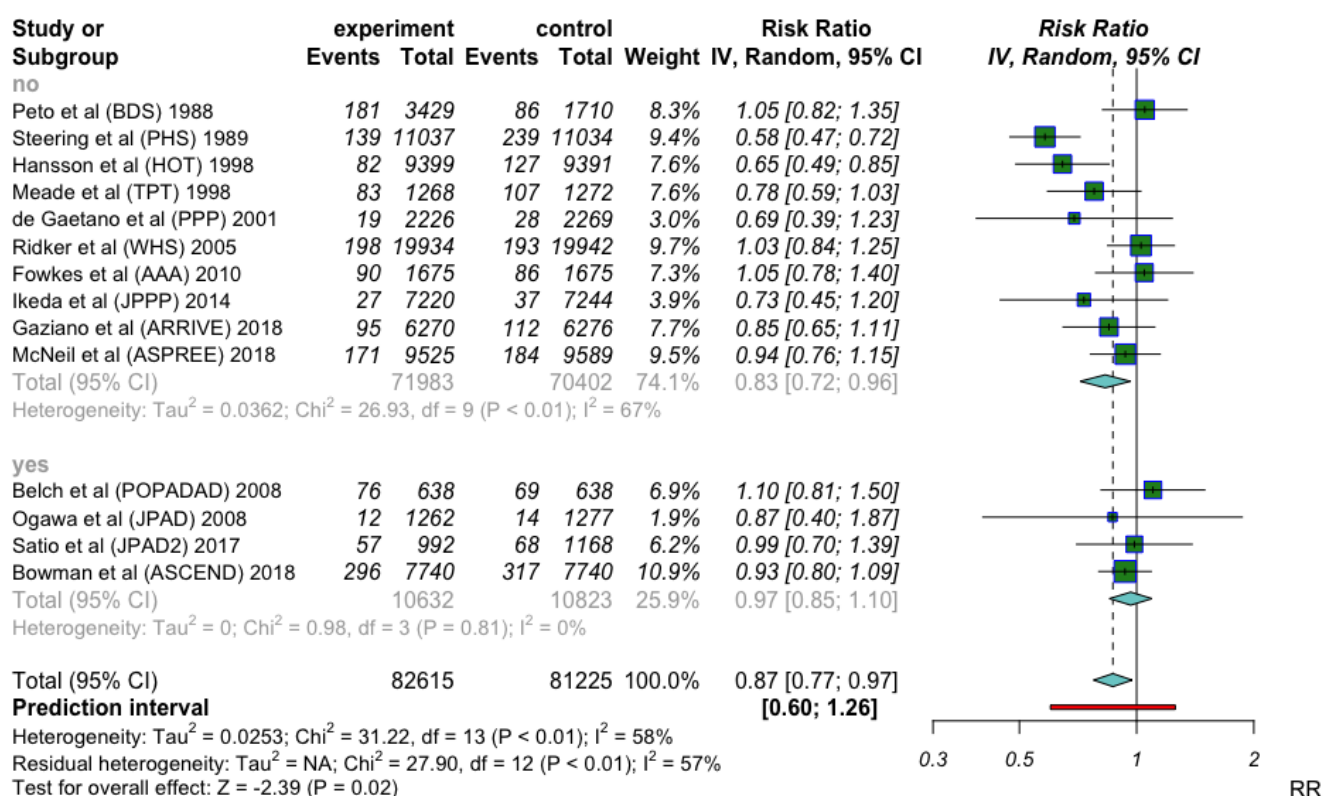

**Figure G.** Summary forest plot for sensitivity analysis on all-MI by placebo use (excluding placebo use trials)

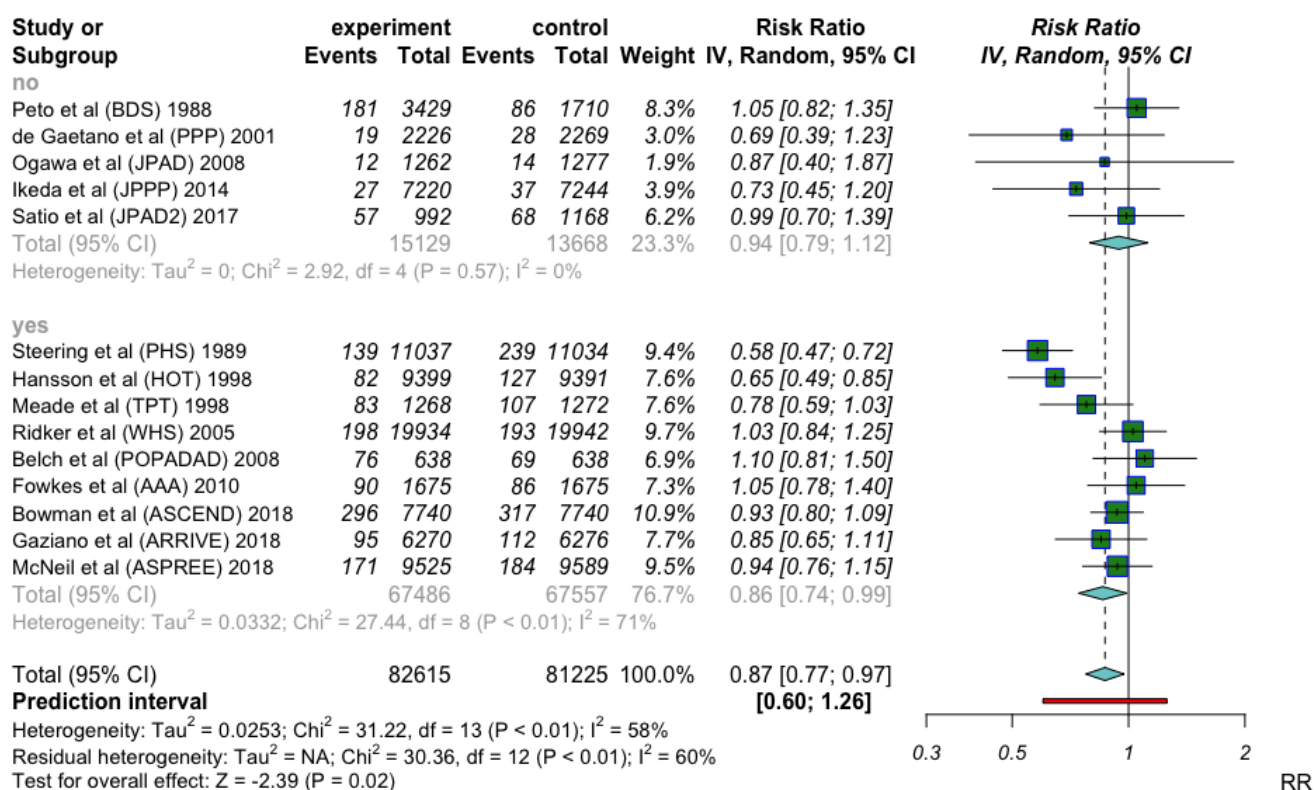



**Figure H.** Summary forest plot for sensitivity analysis on all-MI by excluding TPT trial

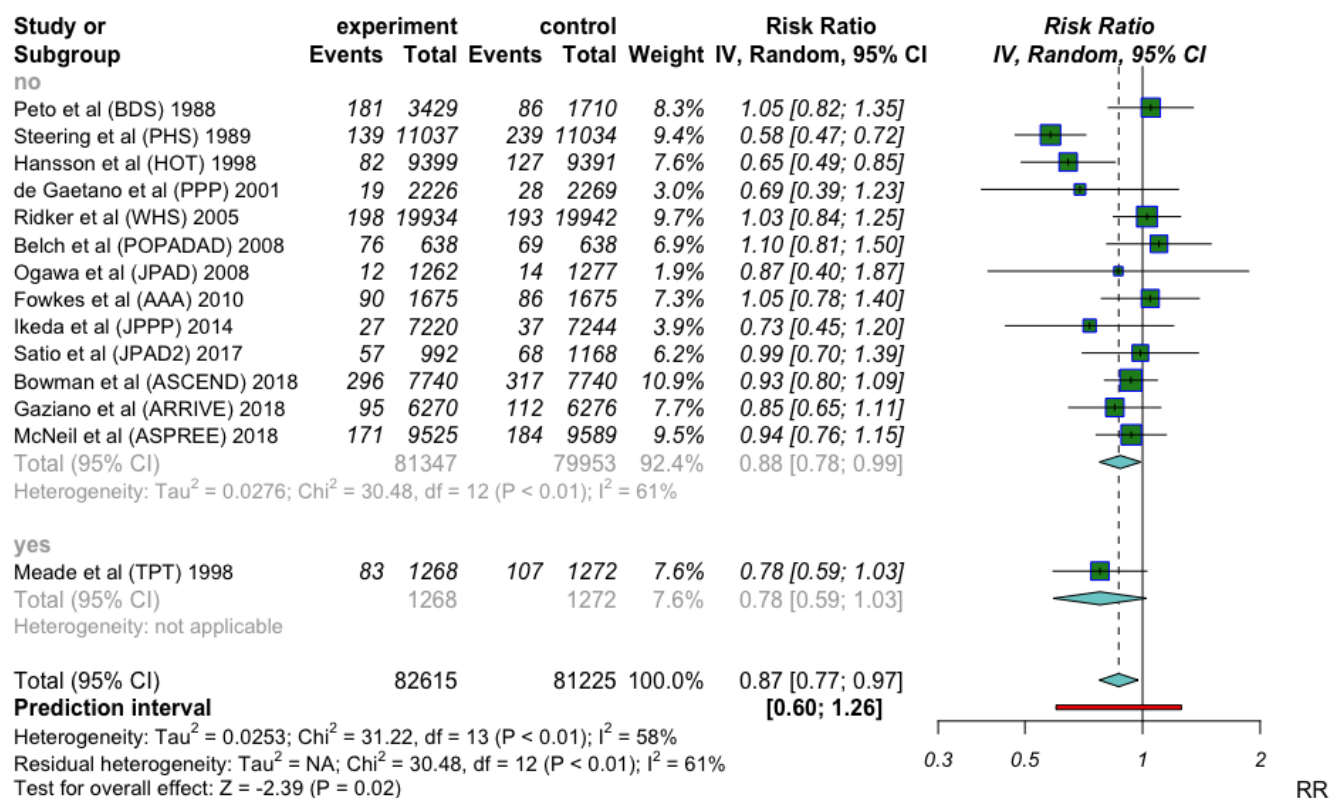

Supplement: Supplementary file [file 26063213]
